# Supplementary material
Source: PubMed Central journal article supplement (PMC3180854)

# Supplementary Figure 1

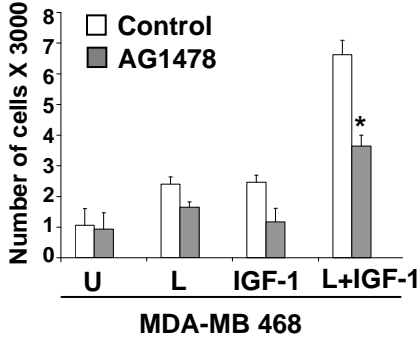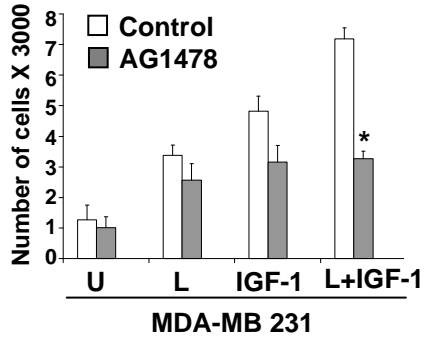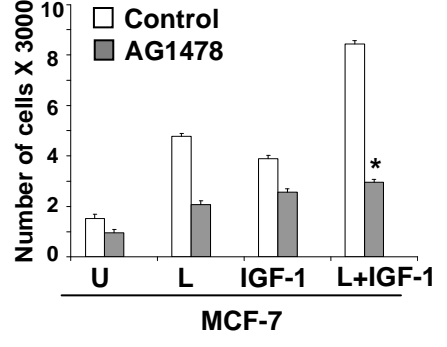

Supplement: NIHMS226732-supplement-supplementary_fig_1.pdf [file NIHMS226732-supplement-supplementary_fig_1.pdf]
